# Supplementary material
Source: MDPI journal article supplement (https://www.mdpi.com/2311-7524/8/11/1003)
Supplement: s1 [file s1 › horticulturae-1951050-supplementary.pdf]

## Supplementary Files:

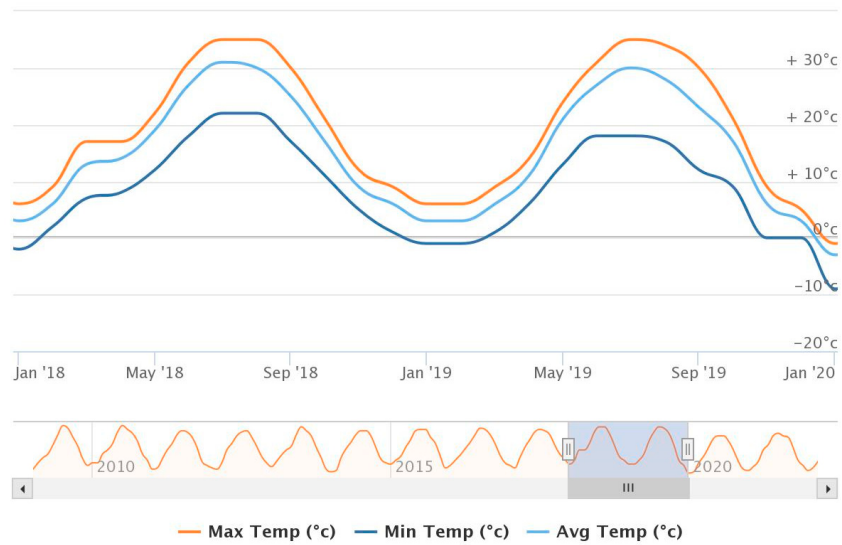

Figure S1a. Diagram of Maximum, Minimum and Average temperature of Tuyserkan in 2018 and 2019.  
Source: <https://www.worldweatheronline.com>

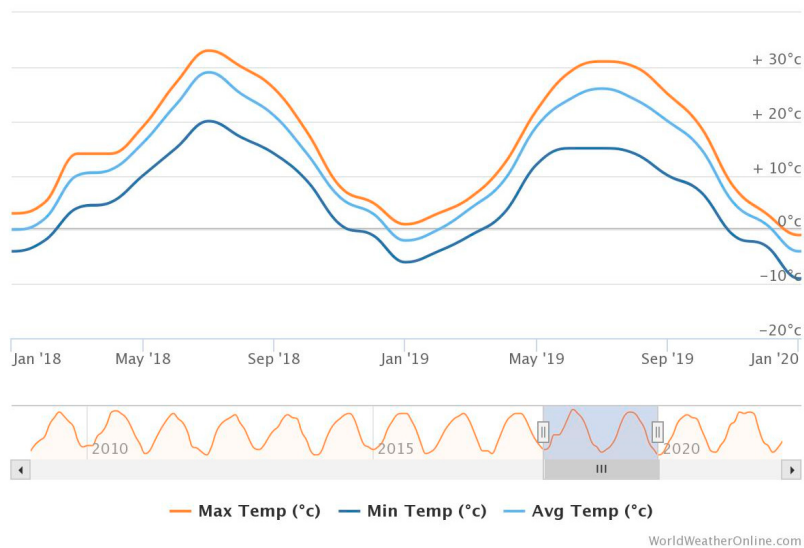

Figure S1b. Diagram of Maximum, Minimum and Average temperature of Razan in 2018 and 2019.  
Source: <https://www.worldweatheronline.com>

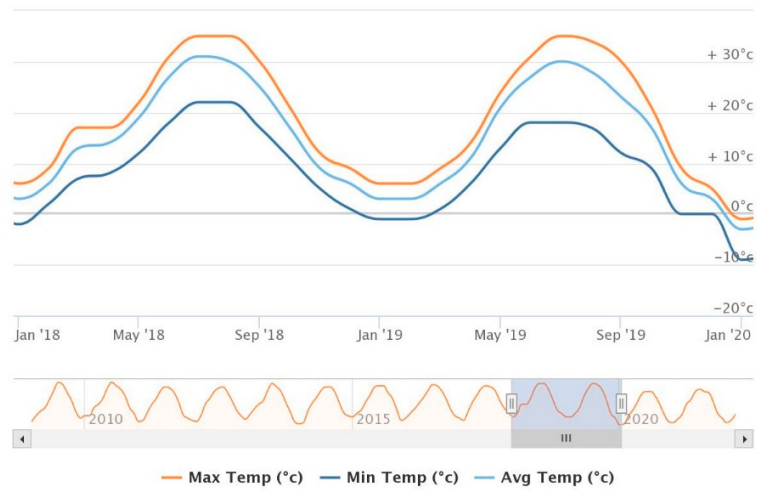

Figure S1c. Diagram of Maximum, Minimum and Average temperature of Kurzan in 2018 and 2019.  
Source: <https://www.worldweatheronline.com>
